# Supplementary material
Source: publisher figshare collection journal article supplement (https://springernature.figshare.com/ndownloader/files/21504585)
Supplement: Supplementary file 1 [file 21504585]

## Sheet: Sheet1
Table S3. Eleven candidate genes were upregulated by NbERF173
Gene ID	TRV-0	TRV-6	NbERF173-0	NbERF173-6	Annotation
Niben101Scf14977g00013	1.0613	5.90749	0.131012	2.92937	Polygalacturonase
Niben101Scf03385g06010	0.134292	2.87609	0.0396919	0.933362	Zinc finger protein 7
Niben101Scf04040g08015	5.36048	18.7354	1.55523	7.98977	17.3 kDa heat shock protein
Niben101Scf04091g00013	8.87469	66.2942	3.9655	27.2209	heat shock protein 21
Niben101Scf14799g01012	1.9724	20.8047	0.461912	10.3429	beta-1,3-glucanase 3
Niben101Scf00294g01014	3.49962	142.269	0	12.5476	Proteinase inhibitor I-B
Niben101Scf05078g05003	1.83449	3.42512	0.685506	3.7807	Peptidyl-prolyl cis-trans isomerase B
Niben101Scf06424g00003	6.76911	108.041	0	18.9469	kunitz trypsin inhibitor 1
Niben101Scf06684g01005	9.49531	54.5311	3.59374	20.7956	Chaperone protein HtpG
Niben101Scf01495g01001	4.61132	16.7656	0.831638	4.40785	Myb-related protein 305
Niben101Scf08873g01022	1.48639	26.8651	0.439905	10.296	ferric reduction oxidase 8
Notes:
NbERF173-0h indicated P. parasitica zoospores infecting NbERF173-silenced N. benthamiana leaves for 0 h;
NbERF173-6h indicated P. parasitica zoospores infecting NbERF173-silenced N. benthamiana leaves for 6 h;
TRV-0h indicated P. parasitica zoospores infecting NbERF173 unsilenced N. benthamiana leaves for 0 h;
TRV-6h indicated P. parasitica zoospores infecting NbERF173 unsilenced N. benthamiana leaves for 6 h.
